# Supplementary material for: The Influence of Home-Based Music Therapy Interventions on Relationship Quality in Couples Living with Dementia—An Adapted Convergent Mixed Methods Study
Source: MDPI journal article supplement (doi:10.3390/ijerph20042863), 2023-02-06
Supplement: s1 [file s1]

QCPR - Quality of Caregiver and Patient Relationship: 14-item-version  
(Spruytte, Van Audenhove & Lammertyn, 2000)

Answering categories:

- 1 = totally disagree
- 2 = disagree
- 3 = undecided
- 4 = agree
- 5 = totally agree

- 1. We often spend time together in a pleasant way
- 2. We often disagree
- 3. A great distance exists between us
- 4. We accept each other the way we are
- 5. When problems occur, we mostly can solve these problems easily
- 7. I get along well with [him/her]
- 10. We offer each other tenderness
- 11. I often get irritated by [him/her]
- 13. When I am with [him/her], I feel very well
- 14. We often try to impose each other's opinion
- 17. I blame [him/her] for being the cause of my problems
- 19. We appreciate each other as a person
- 21. [He/she] does not appreciate enough everything I do for him/her
- 22. When I haven't seen [him/her] for a while, I am happy to see him/her again

Positive subscale on warmth and affection: items 1, 4, 5, 7, 10, 13, 19, 22

Negative subscale on conflict and criticism: items 2, 3, 11, 14, 17, 21  
These items are scored reversed.
